# Supplementary material
Source: HighWire-hosted journal article supplement (doi:10.1101/rna.041566.113)
Supplement: SuppFigLegend.docx [file SuppFigLegend.docx]

**Supplementary Figure 1.**

Experimentally validated secondary structure of the wild type OES (A) and mfold-predicted secondary structures of 5’mut OES (B), the 3’mut OES (C) and the 5’3’mut OES (D).
