# Supplementary material
Source: HighWire-hosted journal article supplement (doi:10.1101/rna.041566.113)

A

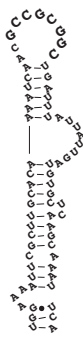

OES wt

B

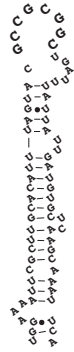

OES 5'mut

C

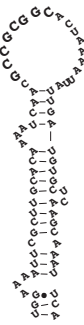

OES 3'mut

D

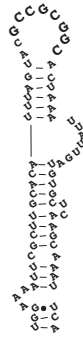

OES 5'3'mut

Supplement: Supp_Fig1.pdf [file Supp_Fig1.pdf]
